# Supplementary material
Source: PubMed Central journal article supplement (PMC3119548)
Supplement: NIHMS284121-supplement-1_si_001.pdf [file NIHMS284121-supplement-1_si_001.pdf]

# Coupling Efficiency of Rhodopsin and Transducin in Bicelles

## Supplementary Information

*Ali I. Kaya<sup>1</sup>, Tarjani M. Thaker<sup>2</sup>, Anita M. Preininger<sup>1</sup>, T. M. Iverson<sup>1, 2‡\*</sup>, Heidi E. Hamm<sup>1\*</sup>*

Departments of <sup>1</sup>Pharmacology, <sup>2</sup>Biochemistry, Vanderbilt University Medical Center,  
Nashville, TN 37232-6600

### RECEIVED DATE.

TITLE RUNNING HEAD. Rhodopsin and transducin coupling in negatively-charged bicelles.

†This work was supported by NIH grant EY006062 to (HEH), and NIH grants GM081816 (TMI), GM0956633 (TMI), and EY018435 (TMI), NARSAD grant 30652 (TMI), and pilot award from the Vanderbilt Institute For Chemical Biology to (TMI).

‡ Co-contributing author

\* To whom correspondence should be addressed. HEH: fax, (615) 343-1084; phone, (615) 343-3533; email, [heidi.hamm@vanderbilt.edu](mailto:heidi.hamm@vanderbilt.edu); TMI: fax, (615) 343-6532; phone, (615) 322-7817; email, [tina.iverson@vanderbilt.edu](mailto:tina.iverson@vanderbilt.edu).

**Supplementary Table 1**

| Bicelle Composition | $D_T(10^{-9}\text{cm}^2/\text{s})$ | $R_h$ (nm) | MW (kDa)    | PolyD (nm) | % PolyD  | PolyD Index |
|---------------------|------------------------------------|------------|-------------|------------|----------|-------------|
| Conalbumin          | 659.9                              | 3.8        | 74.4        | 0.8        | 21.4     | 0.1         |
| DDM                 | 737.2                              | 3.5        | 65.2        | 1.0        | 27.6     | 0.1         |
| 2% DMPC:DHPC        | 198.6±14.9                         | 10.3±1.1   | 816.8±207.2 | 2.6±0.8    | 25.5±8.0 | 0.1±0.1     |
| 4% DMPC:DHPC        | 384.9±104.6                        | 5.8±1.2    | 232.0±87.4  | 1.3±0.6    | 20.6±6.5 | 0.1±0.1     |
| 8% DMPC:DHPC        | 641.4±28.3                         | 3.3±0.1    | 55.6±2.2    | 0.3±0.1    | 8.1±4.1  | 0.0         |
| 2% PS (70:30)       | 201.5±7.1                          | 11.2±1.3   | 996.7±265.8 | 3.4±0.6    | 29.6±2.1 | 0.1±0.0     |
| 4% PS (70:30)       | 307.8±13.9                         | 6.8±0.1    | 292.3±12.7  | 1.1±0.1    | 16.5±2.0 | 0.0         |
| 8% PS (70:30)       | 370.6±5.7                          | 5.4±0.1    | 1721±3.5    | 0.7±0.2    | 13.2±2.7 | 0.0         |
| 2% PA (70:30)       | 222.2±10.9                         | 9.9±1.6    | 769.4±292.2 | 2.7±0.9    | 26.1±4.6 | 0.1±0.1     |
| 4% PA (70:30)       | 327.2±18.2                         | 6.7±0.4    | 290.6±42.1  | 1.7±0.1    | 26.5±3.7 | 0.1±0.1     |
| 8% PA (70:30)       | 373.8±4.1                          | 5.7±0.1    | 194.4±7.9   | 1.4±0.1    | 24±1.6   | 0.1 ± 0.1   |
| 2% PS (50:50)       | 252.2±33.8                         | 9.8±1.9    | 794±375.1   | 2.7±0.5    | 27.5±1.8 | 0.1±0.1     |
| 4% PS (50:50)       | 279.6±21.6                         | 7.4±0.3    | 369±31.2    | 1.1±0.3    | 15±3.4   | 0.0         |
| 8% PS (50:50)       | 380±21.5                           | 5.4±0.3    | 177.8±22.4  | 1.2±0.1    | 22.8±2.7 | 0.1±0.1     |
| 2% PS+PA (70:30)    | 230.4±21.1                         | 9.7±1.4    | 742.4±244.  | 2.7±0.6    | 26.5±2.6 | 0.1±0.1     |
| 4% PS+PA (70:30)    | 297.0±15.9                         | 7.3±0.3    | 350.2±31.0  | 1.6±0.1    | 21.6±0.7 | 0.1±0.1     |
| 8% PS+PA(70:30)     | 387.5±6.1                          | 5.4±0.1    | 171.7±5.9   | 1.4± 0.1   | 26.4±1.5 | 0.1±0.1     |
| 2% PS+PA (60:40)    | 197.5±24.2                         | 11.6±2.4   | 1188±574.7  | 3.0±1.0    | 24.2±3.5 | 0.1±0.1     |
| 4% PS+PA (60:40)    | 309.9±17.6                         | 6.8±0.3    | 300.5±33.9  | 1.6±0.2    | 23.6±3.9 | 0.1±0.1     |
| 8% PS+PA(60:40)     | 386±3.4                            | 5.4±0.1    | 171.4±1.7   | 1.5±0.1    | 28.7±1.3 | 0.1±0.1     |

**Supplementary Table 1.** Dynamic Light Scattering (DLS) measurements of negatively charged bicelles. All bicelle samples were prepared in extra MII assay buffer (50 mM HEPES pH 8.0, 100 mM NaCl, 1 mM  $\text{MgCl}_2$ ). 2 mg/mL Conalbumin (75 kDa) and 0.5 mM DDM (70 kDa) were prepared as positive controls. Hydrodynamic radii were determined by Dynamics V5 software

with light scattering data collected at 18-22 °C on a DynaPro detector. The final concentration of phospholipids was 2%, bicelles was 4 or 8%. The ratio of neutral to negatively charged phospholipids is indicated within the parentheses in the table. Results are means  $\pm$  S.E.M. of at least 25 scans with three independent experiments.

## Supplementary Table 2

|              | EC <sub>50</sub> ± S.E.M.<br>(μM) | n |
|--------------|-----------------------------------|---|
| ROS          | 0.64 ± 0.09                       | 6 |
| DDM          | 3.14 ± 0.05                       | 4 |
| PA(70:30)    | 1.08 ± 0.12                       | 3 |
| PS(70:30)    | 1.08 ± 0.09                       | 3 |
| PS(50:50)    | 1.07 ± 0.07                       | 4 |
| PA+PS(70:30) | 0.94 ± 0.06                       | 3 |
| PA+PS(60:40) | 0.79 ± 0.05                       | 3 |

**Supplementary Table 2.** The affinity of G<sub>t</sub> for Rhodopsin in the presence or absence of bicelles. The concentration response curves were measured at 4 °C in the presence of different amount of G<sub>t</sub>. Final concentration of bicelle was 8% (lipid:rhodopsin ratio of approximately 12800:1). The ratio of neutral to negatively charged phospholipids is indicated with parenthesis in the table. The concentration-response curves were analyzed using a four parameter logistic equation. Results are mean ± S.E.M. values from at least three independent experiments.

**Supplementary Table 3**

|              | 4 °C, pH 8.2                      | 15 °C, pH 8.2                     |
|--------------|-----------------------------------|-----------------------------------|
|              | $t_{1/2} \pm \text{S.E.M. (day)}$ | $t_{1/2} \pm \text{S.E.M. (day)}$ |
| ROS          | $0.6 \pm 0.01$                    | $0.5 \pm 0.01$                    |
| DDM          | $0.1 \pm 0.01$                    | $0.1 \pm 0.5$                     |
| PS(70:30)    | $5.4 \pm 0.2$                     | $3.3 \pm 0.3$                     |
| PS(50:50)    | $5.8 \pm 0.3$                     | $3.9 \pm 0.1$                     |
| PA(70:30)    | $5.9 \pm 0.2$                     | $3.1 \pm 0.1$                     |
| PA+PS(70:30) | $6.8 \pm 0.3$                     | $4.6 \pm 0.3$                     |
| PA+PS(60:40) | $7.0 \pm 0.3$                     | $4.9 \pm 0.4$                     |

**Supplementary Table 3** Extra-metarhodopsin II decays of rhodopsin in the presence of negatively charged bicelles. The extra-metarhodopsin II decay was measured at 4 °C and 15 °C. The final concentration of each bicelle mixture is 8% (lipid:rhodopsin ratio of approximately 12800:1). The ratio of neutral to negatively charged phospholipids is indicated within parentheses. The half life of extra MII signal was calculated using an exponential decay equation. Results are mean  $\pm$  S.E.M. values from at least three independent experiments.

## Supplementary Figure 1

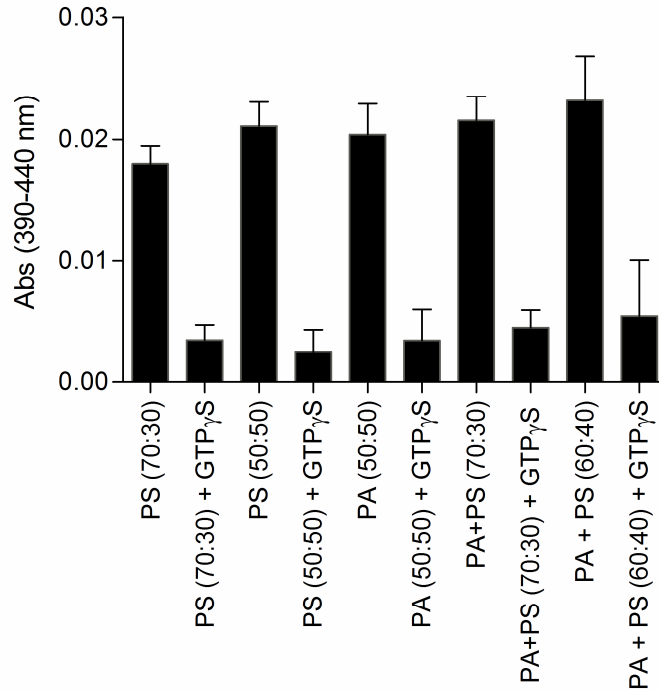

**Supplementary Figure 1** The extra MII decay was measured at 4 °C and pH 8.2. To test Receptor-G protein coupling, we added excess GTP $\gamma$ S which terminates receptor-G protein interaction, and we measured this loss of coupling as the loss of the extra-MII signal. We added 150  $\mu$ M GTP $\gamma$ S 48 hours after starting from the decay experiment. Then, after 5 min. incubation with GTP $\gamma$ S, we measured extra-metarhodopsin signal again. The final bicelle concentration is 8%. Results are mean  $\pm$  S.E.M. values of at least three independent experiments.

## Supplementary Figure 2

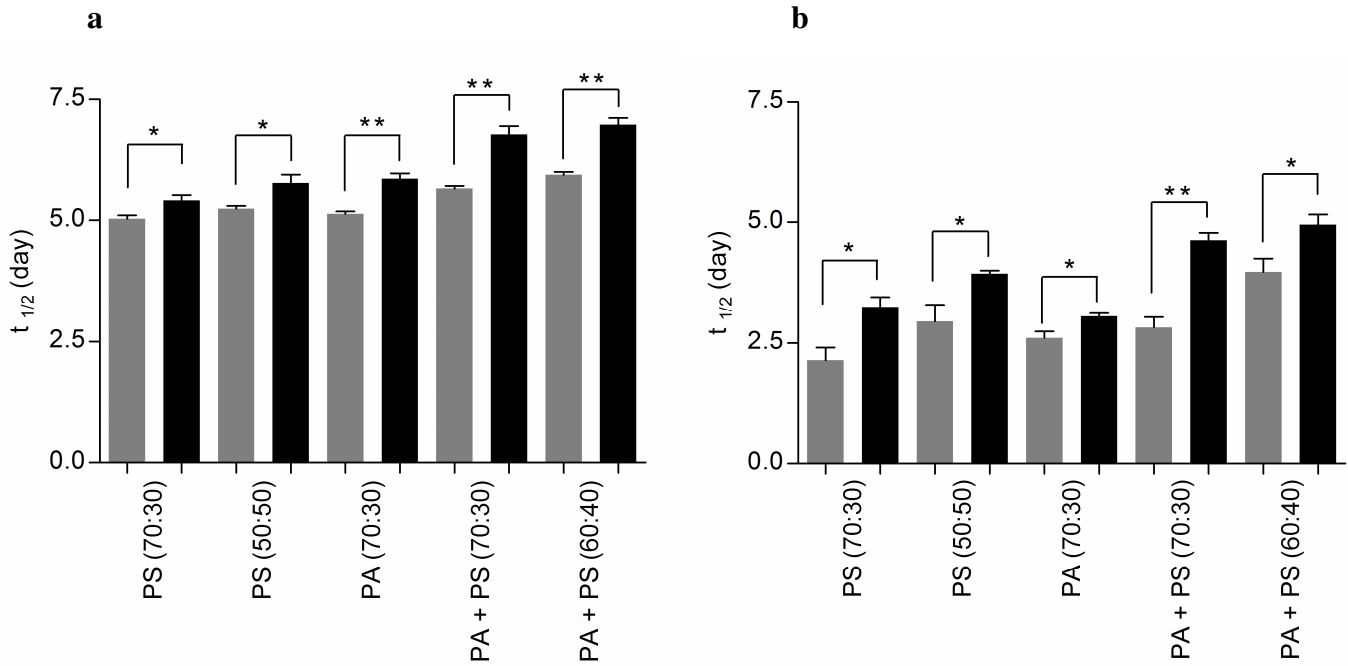

**Supplementary Figure 2** Stability of rhodopsin- $G_i$ (empty) complex in the presence of negatively charged bicelles. The effect of negatively charged bicelles on complex stability was evaluated at **(a)** 4 °C and **(b)** 15 °C. The final concentration of phospholipids was 2% (grey bars), bicelles was 8% (black bars). The lipid:rhodopsin ratio was approximately 12800:1. The ratio of neutral to negatively charged phospholipids is indicated within the parentheses in the graphs. The half life of the extra MII signal was calculated by using an exponential decay equation. Results are mean  $\pm$  S.E.M. values from at least three independent experiments (\*  $p < 0.05$ ; \*\*  $p < 0.005$ ).

**Supplementary Table 4**

|               | Initial rates $\pm$ S.E.M.<br>(1 / sec $\times 10^{-2}$ ) |
|---------------|-----------------------------------------------------------|
| $G_t$         | $0.15 \pm 0.06$                                           |
| ROS           | $2.21 \pm 0.12$                                           |
| DDM           | $1.08 \pm 0.07$                                           |
| PS (70:30)    | $2.59 \pm 0.26$                                           |
| PS (50:50)    | $2.88 \pm 0.13$                                           |
| PA (70:30)    | $2.82 \pm 0.34$                                           |
| PA+PS (70:30) | $4.62 \pm 0.30$                                           |
| PA+PS (60:40) | $4.48 \pm 0.51$                                           |

**Supplementary Table 4.** Basal and receptor mediated nucleotide exchange rates of  $G_t$  in the presence of different bicelles. Final concentration of bicelles was 8% (lipid:rhodopsin ratio of approximately 12800:1). The ratio of neutral to negatively charged phospholipids is indicated within parentheses. The initial nucleotide exchange rates are shown in  $\text{sec}^{-1} \times 10^{-2}$  for  $G_t$ . The exchange rate was determined by fitting the data to an exponential association equation  $F\lambda = F\lambda_{\text{max}}(1 - e^{-kt})$ . Results are mean  $\pm$  S.E.M. values from at least three independent experiments.
